# Supplementary material for: Lack of a protective effect of the Tmem106b “protective SNP” in the Grn knockout mouse model for frontotemporal lobar degeneration
Source: PubMed Central journal article supplement (PMC9881268; doi:10.1186/s40478-023-01510-3), 2023-01-27
Supplement: 40478_2023_1510_MOESM1_ESM.pdf [file 40478_2023_1510_MOESM1_ESM.pdf]

## Supplemental Figure 1

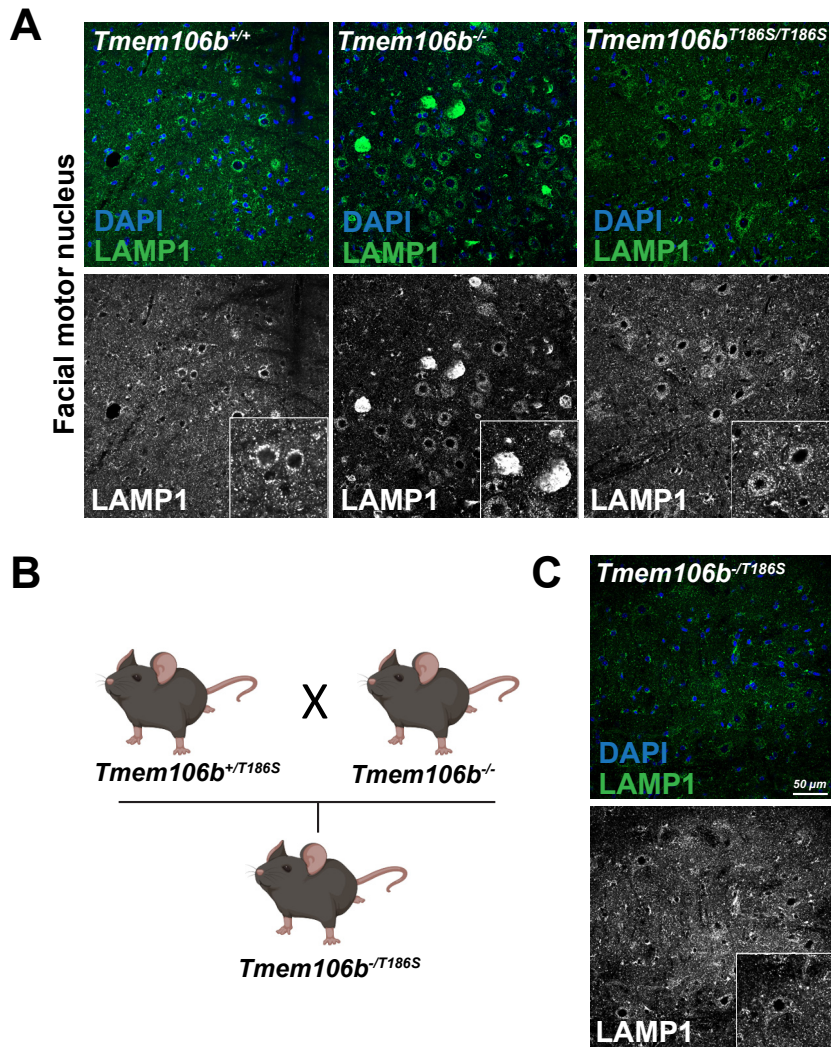

**Supplementary Fig.1** (A) Representative images of immunofluorescence stainings of the facial motor nucleus of a *wildtype*, *Tmem106b*<sup>-/-</sup>, *Tmem106b*<sup>T186S/T186S</sup> mouse with an antibody against LAMP1 (upper panel green, lower panel white). Nuclei are stained with DAPI (upper panel, blue). (B) Breeding scheme depicting the crossing of *Tmem106b*<sup>+/*T186S*</sup> and *Tmem106b*<sup>-/-</sup> to produce *Tmem106b*<sup>-/*T186S*</sup> with one knockout allele and one knockin allele. (C) Representative images of immunofluorescence stainings of the facial motor nucleus of a *Tmem106b*<sup>-/*T186S*</sup> mouse with an antibody against LAMP1 (upper panel green, lower panel white). Nuclei are stained with DAPI (upper panel, blue).

## Supplemental Figure 2

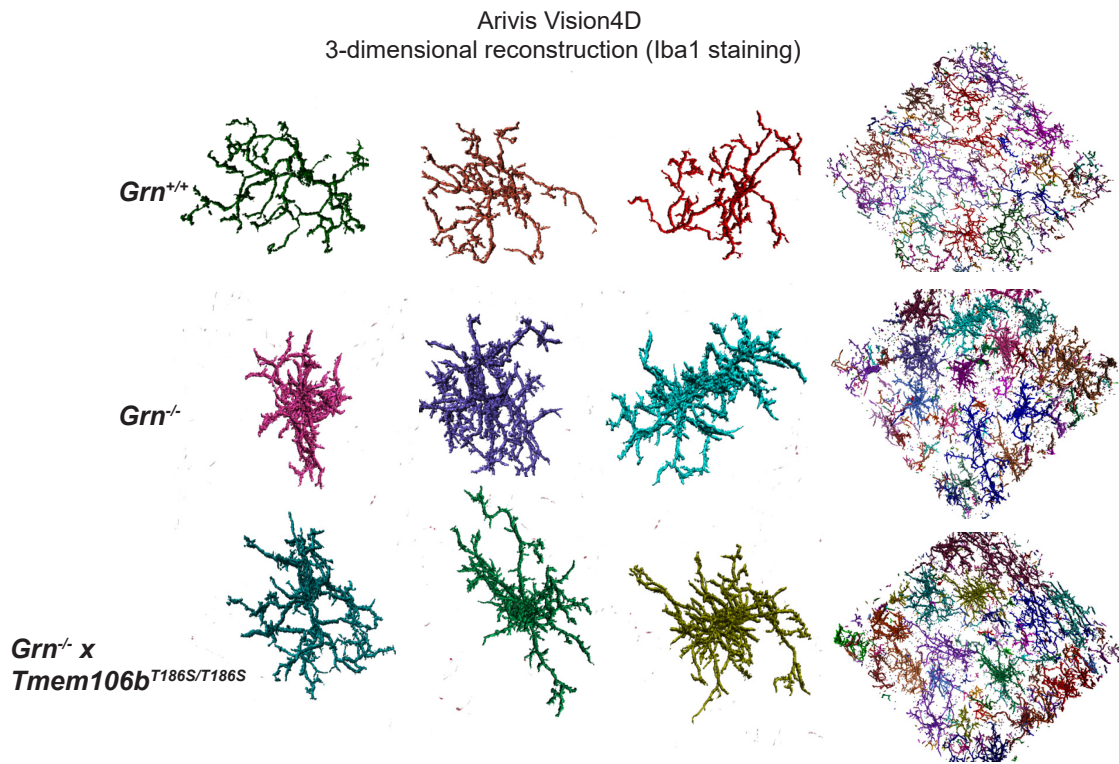

**Supplementary Fig.2** Three-dimensional reconstructions of individual Iba-1 stained microglia cells of the thalamus of *Grn*<sup>+/+</sup>, *Grn*<sup>-/-</sup> and *Grn*<sup>-/-</sup> *Tmem106b*<sup>T186S/T186S</sup> mice (pseudocolored, three examples/genotype) used for cell-volume calculation. The panel on the right depicts overview images used for quantification. 50 images were acquired in the Z-direction and assembled with the arivis Vision4D 3.3 software (Zeiss).
